# Supplementary material
Source: publisher site journal article supplement (http://www.kjim.org/upload/media/kjim-2021-069-suppl5.pdf)
Supplement: Supplementary file 1 [file kjim-2021-069-suppl5.pdf]

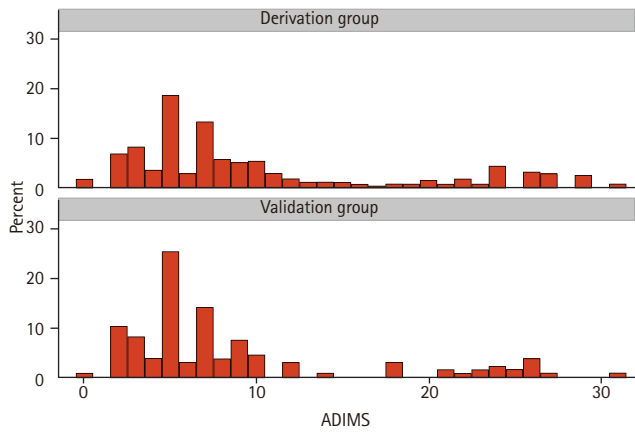

**Supplementary Figure 1.** Distribution of Acute Eosinophilic Pneumonia Diagnostic Index in Military Smokers (ADIMS) in the derivation and validation groups. The distribution of ADIMS is largely similar in the derivation and validation groups.
